# Supplementary material for: Interleukin 34 Serves as a Novel Molecular Adjuvant against Nocardia Seriolae Infection in Largemouth Bass (Micropterus Salmoides)
Source: PubMed Central journal article supplement (PMC7349345; doi:10.3390/vaccines8020151), 2020-03-28

Supplementary Materials

## Interleukin 34 serves as a novel molecular adjuvant against *Nocardia seriolae* infection in largemouth bass (*Micropterus salmoides*)

Huy Hoa Hoang, Pei-Chi Wang, Shih-Chu Chen

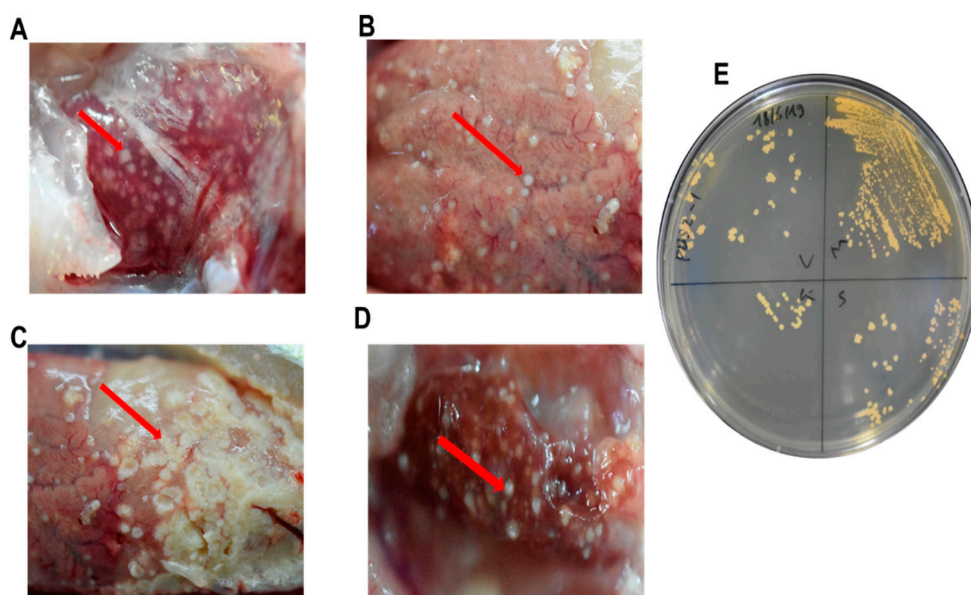

**Figure S1.** Multiple white nodules found in different organs of dead fish and re-isolation of *N. seriolae*. (A) Head kidney; (B) Liver; (C) Mesentery; (D) Spleen; (E) Pure colonies of *N. seriolae* growth in BHI-agar. Red arrow indicated the white nodules

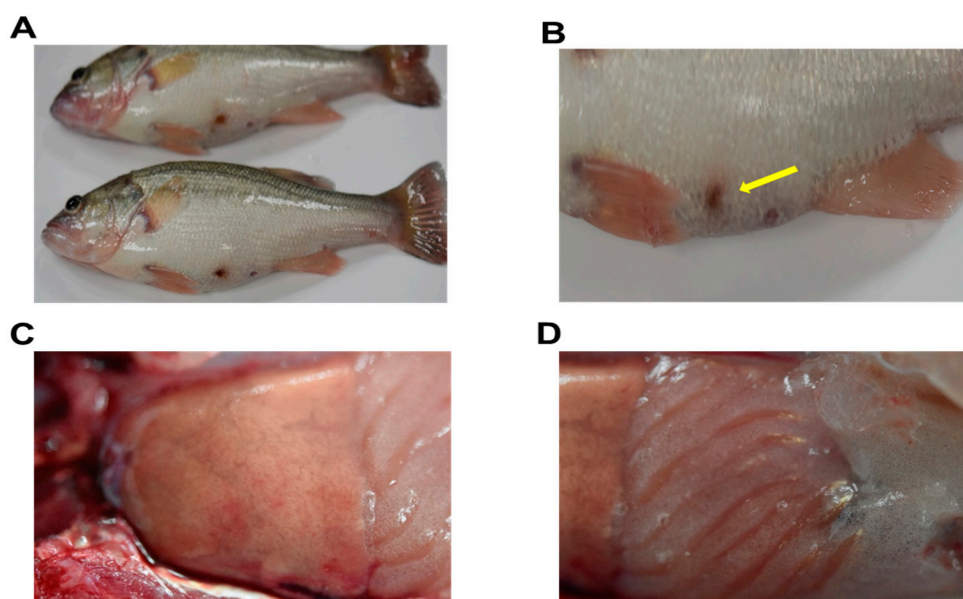

**Figure S2.** Pathological signs of survival fish in pcIL-34 vaccinated group. (A) Side view of fish; (B) No ulcer found in ventral side of fish – injection site (yellow arrows); (C) Liver; (D) Mesentery.

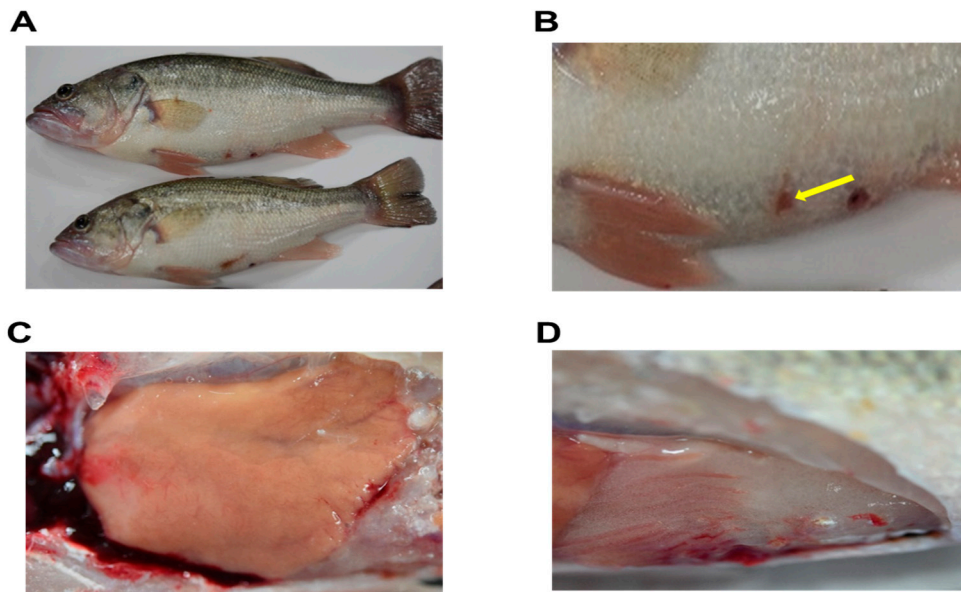

**Figure S3.** Pathological signs of survival fish in pcHrp1 vaccinated group. **(A)** Side view of fish; **(B)** No ulcer found in ventral side of fish – injection site (yellow arrows); **(C)** Liver; **(D)** Mesentery.

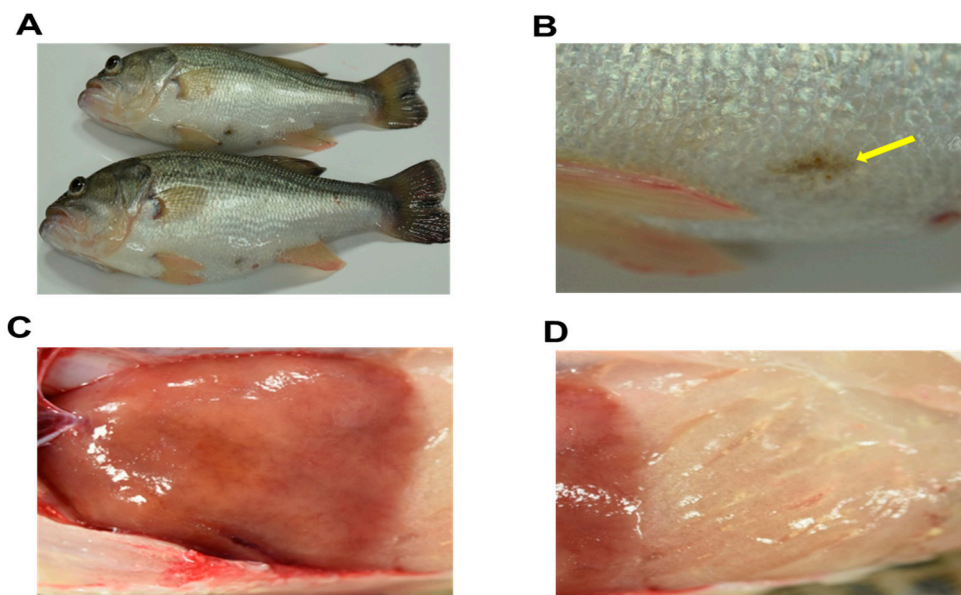

**Figure S4.** Pathological signs of survival fish in pcHrp1 + pcIL-34 vaccinated group. **(A)** Side view of fish; **(B)** No ulcer found in ventral side of fish – injection site (yellow arrows); **(C)** Liver; **(D)** Mesentery.

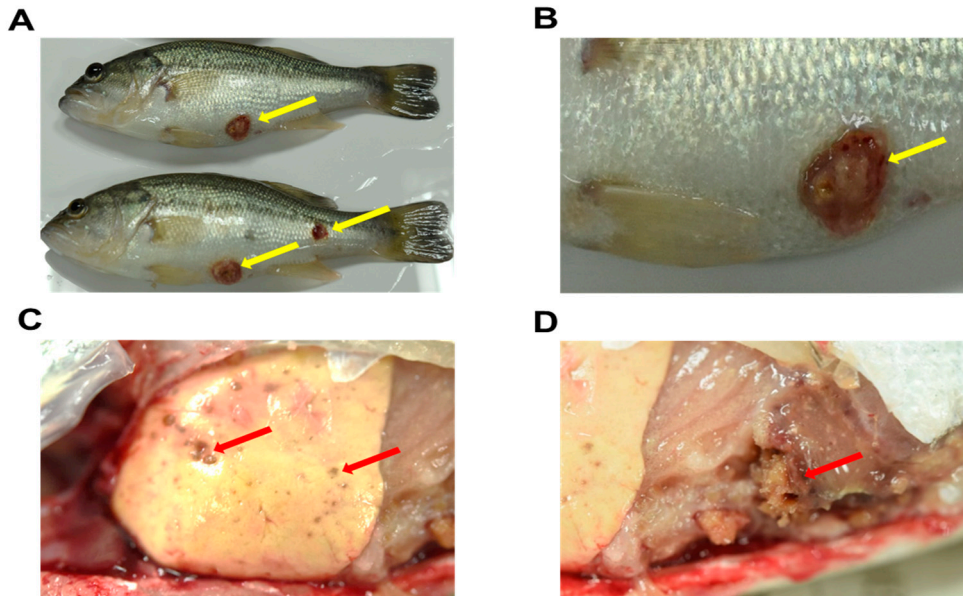

**Figure S5.** Pathological signs of survival fish in PBS injected group. **(A)** Side view of fish with ulcer at injection site (yellow arrows); **(B)** Ulcer found in ventral side of fish – injection site (yellow arrows); **(C)** Nodules found in liver (red arrow) ; **(D)** Nodule found in mesentery (red arrow).

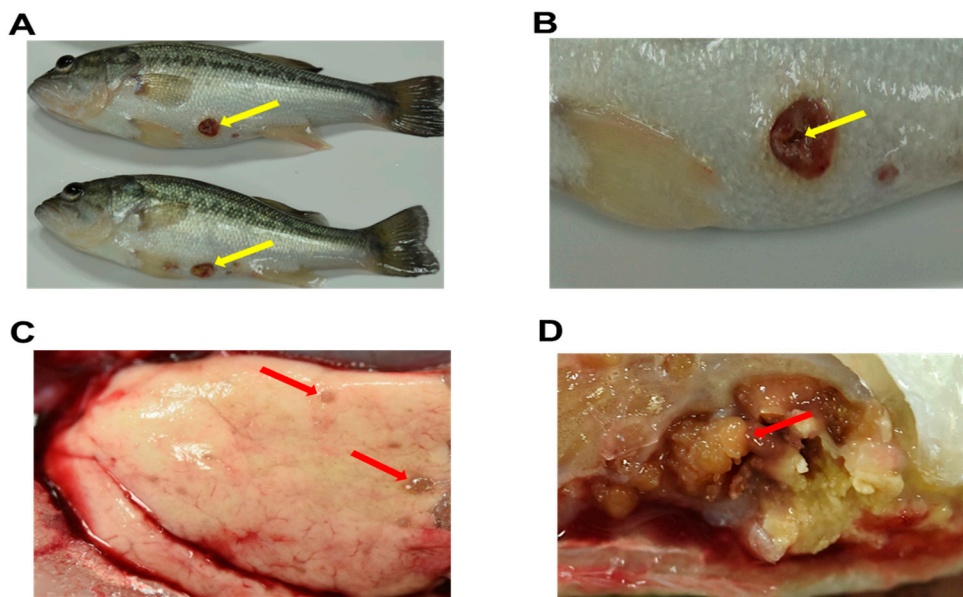

**Figure S6.** Pathological signs of survival fish in pcDNA3.1 injected group. **(A)** Side view of fish with ulcer at injection site (yellow arrows); **(B)** Ulcer found in ventral side of fish – injection site (yellow arrows); **(C)** Nodules found in liver (red arrow) ; **(D)** Nodule found in mesentery (red arrow).

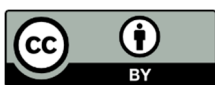

Supplement: vaccines-08-00151-s001.pdf [file vaccines-08-00151-s001.pdf]
